# Supplementary material for: Magnetic enrichment of immuno-specific extracellular vesicles for mass spectrometry using biofilm-derived iron oxide nanowires
Source: Royal Society of Chemistry journal article supplement (doi:10.1039/d2nr05619d), 2022-12-19
Supplement: d2nr05619d1.pdf [file d2nr05619d1.pdf]

## Supporting Information

### **Magnetic Enrichment of Immuno-Specific Extracellular Vesicles for Mass Spectrometry Using Biofilm-Derived Iron Oxide Nanowires**

Quang Nghia Pham,<sup>a</sup> Marnie Winter,<sup>\*a</sup> Valentina Milanova,<sup>a</sup> Clifford Young,<sup>b</sup> Mark R. Condina,<sup>a</sup> Peter Hoffmann,<sup>b</sup> Nguyen T. H. Pham,<sup>c</sup> Tran Thanh Tung,<sup>d</sup> Dusan Losic,<sup>d</sup> Benjamin Thierry<sup>\*a</sup>

<sup>a</sup>Future Industries Institute, University of South Australia, Mawson Lakes Campus, Mawson Lakes, Adelaide, South Australia 5095, Australia

<sup>b</sup>Clinical and Health Science, University of South Australia, 5000, Australia

<sup>c</sup>Key Centre for Polymers and Colloids, School of Chemistry, The University of Sydney, Sydney, New South Wales 2006, Australia

<sup>d</sup>School of Chemical Engineering and Advanced Materials, The University of Adelaide, Adelaide, South Australia 5005, Australia

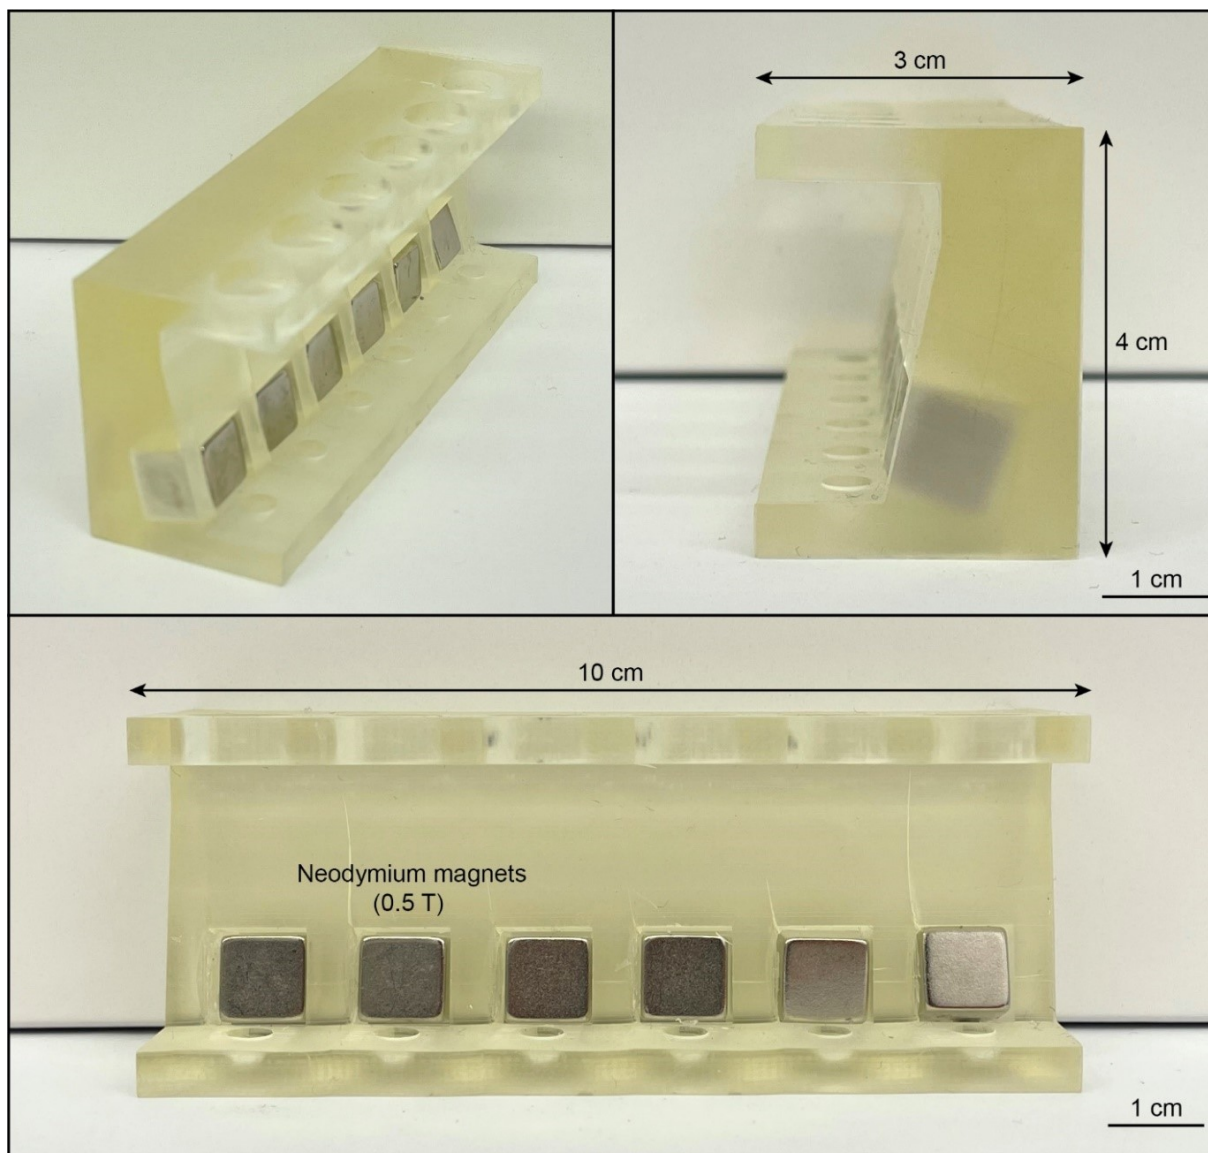

**Fig. S1** Images of the in-house 3D-printed magnetic separation rack used for immuno-magnetic isolation of EVs. The rack was designed to fit 1.5-mL and 2.0-mL Eppendorf tubes and neodymium magnets (Grade N42, 0.5 T, 10 × 10 × 10 mm).

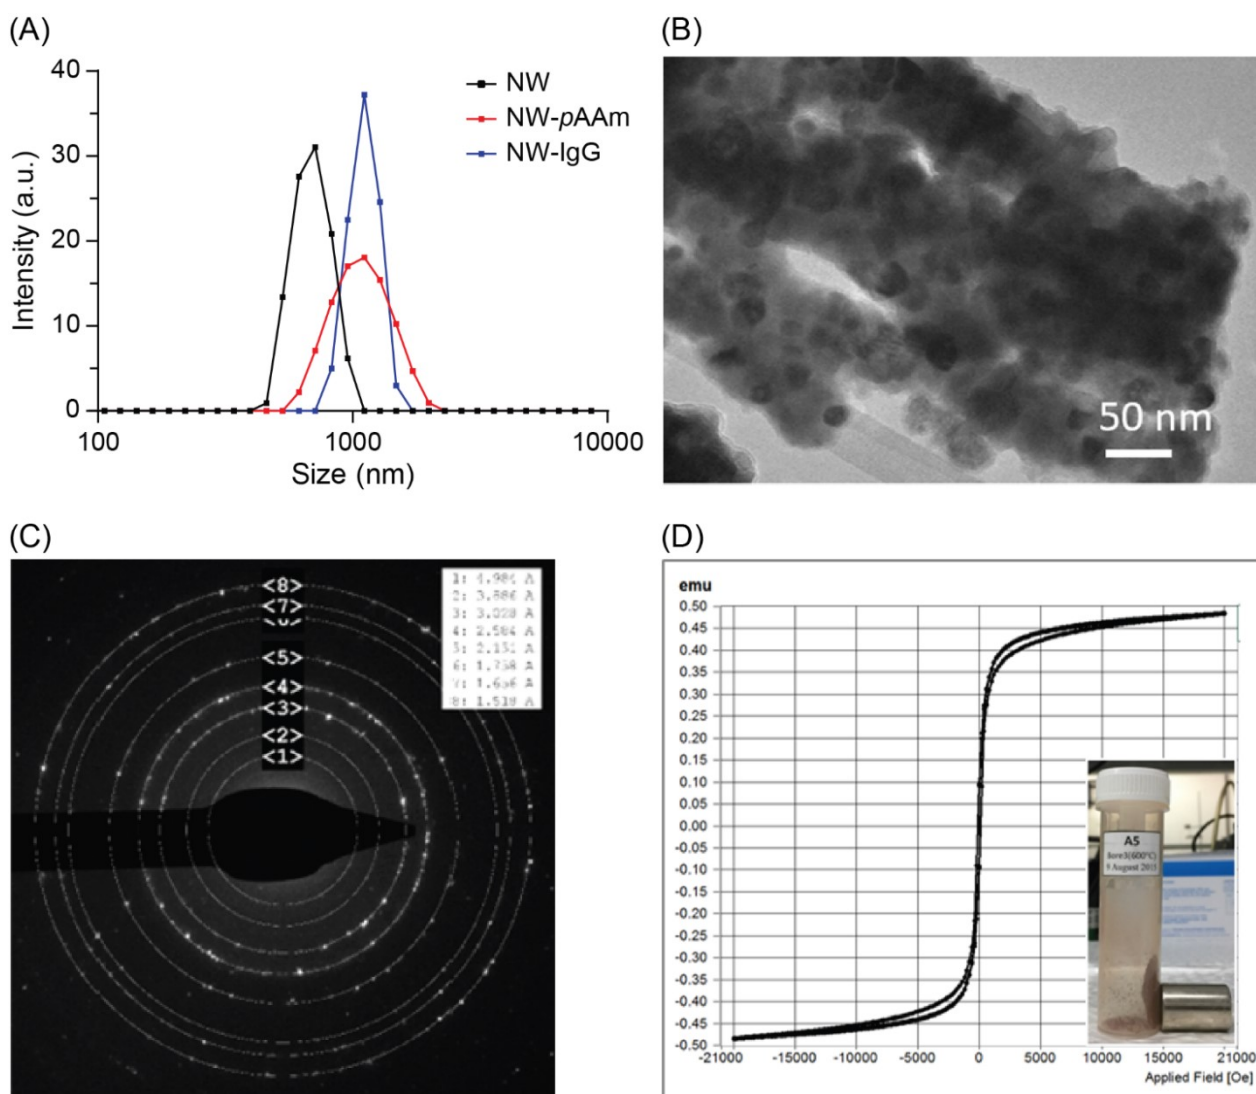

**Fig. S2** (A) Monitoring of changes in NWs' scattering by dynamic light scattering during the coating procedure. (B) Transmission electron microscope image and (C) diffraction pattern of iron oxide NWs showing wire-like structures with diameters of 50–80 nm and polycrystalline rings with lattice refractions corresponding to a mixture of magnetite and hematite structures. (D) The magnetic hysteresis curves of iron oxide NWs revealing a ferromagnetic behaviour of the material with a photo (inset) demonstrating the magnetic property of iron oxide NWs using a magnet.

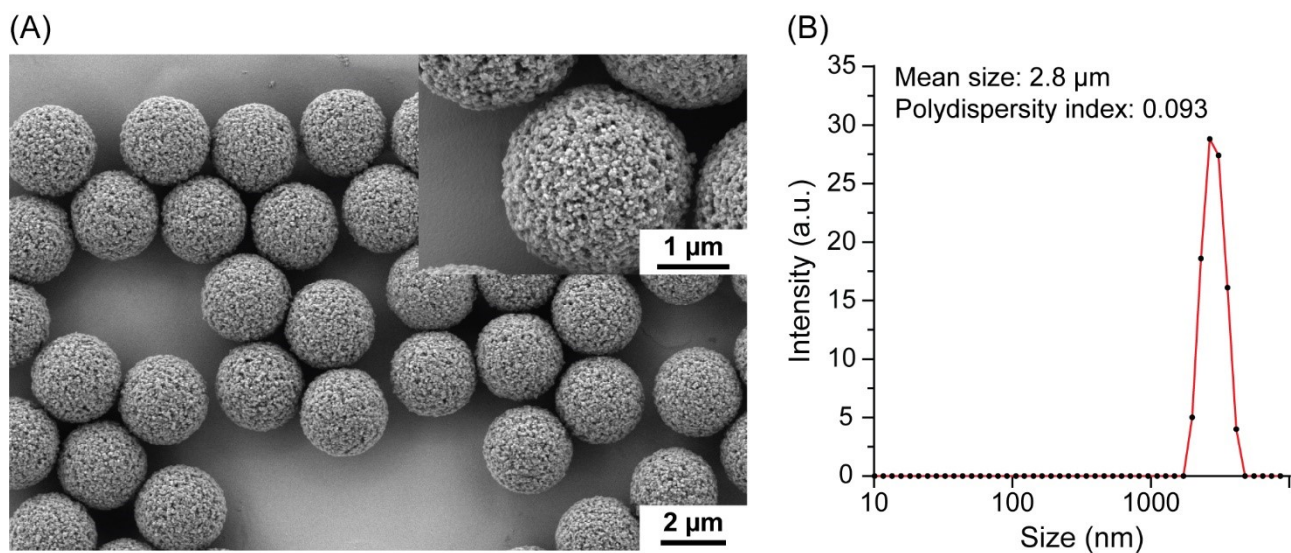

**Fig. S3** (A) Scanning electron microscopy images of Dynabeads M-270 carboxylic acid. Inset is the SEM image at a higher magnification. (B) Dynamic light scattering size measurement of Dynabeads.

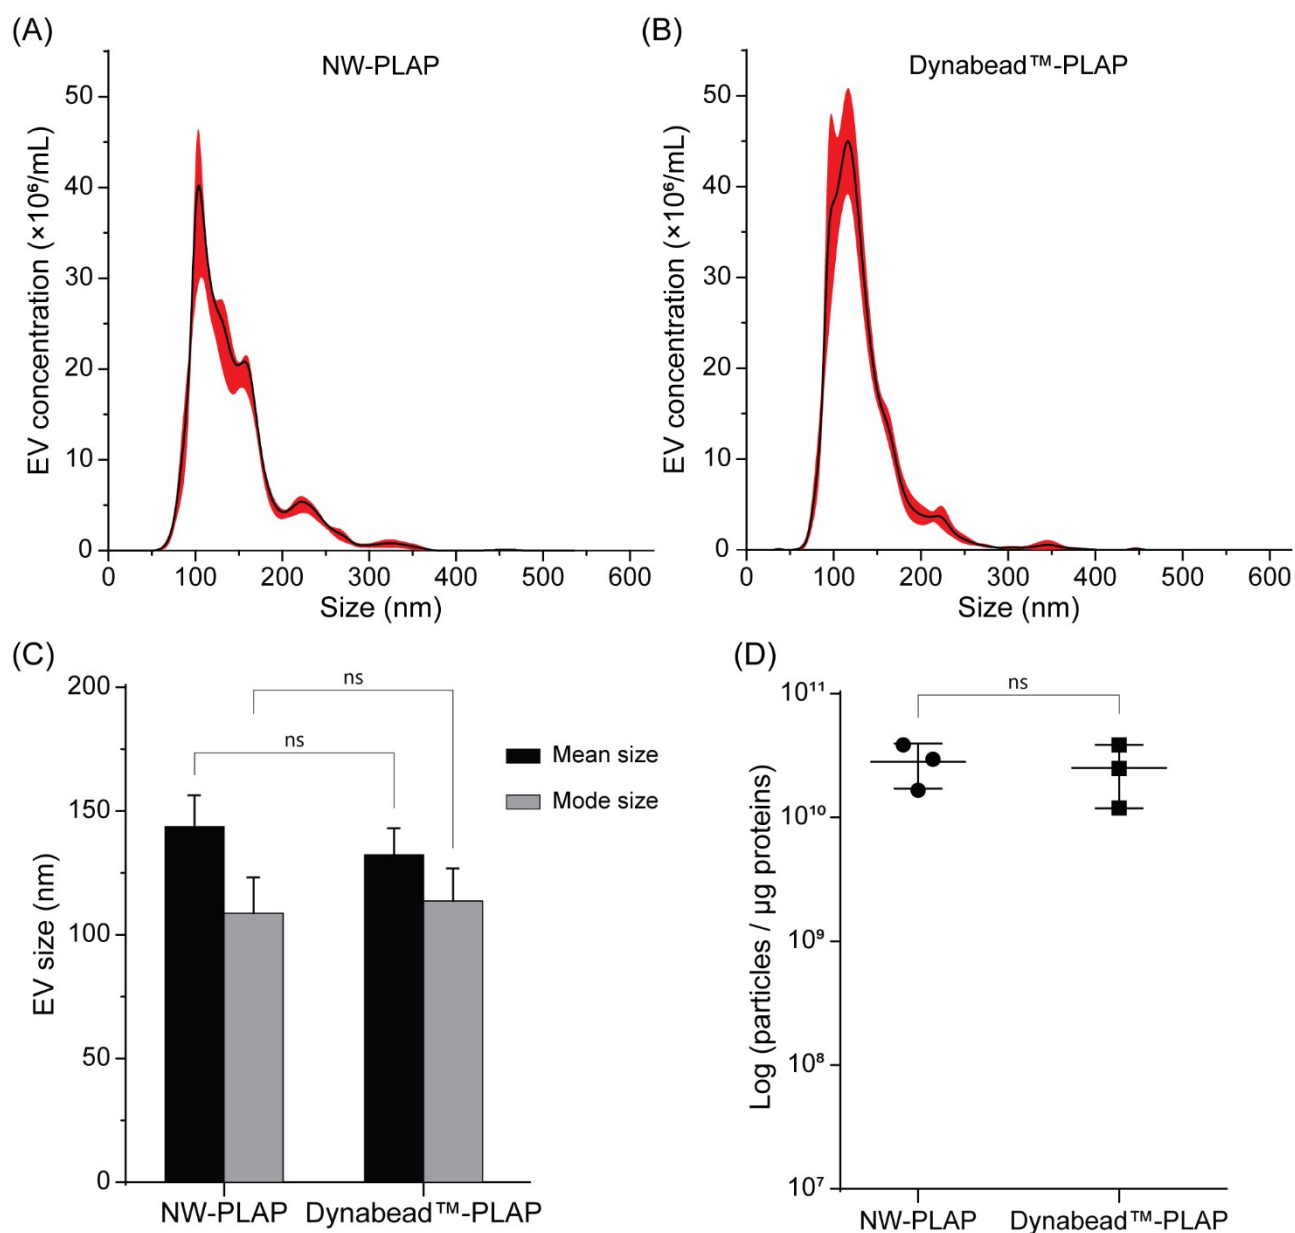

**Fig. S4** Nanoparticle tracking analysis of eluted EVs enriched by (A) NW-PLAP and (B) Dynabead™-PLAP. (C) Mean size and mode size of eluted EVs. (D) The particle to protein ratio of PLAP+ve EVs enriched by NW-PLAP and Dynabead™-PLAP. Data are presented as means + SD ( $n = 3$ , independent Student's t-test with 95% confidence interval, ns = not significant,  $p > 0.05$ ).

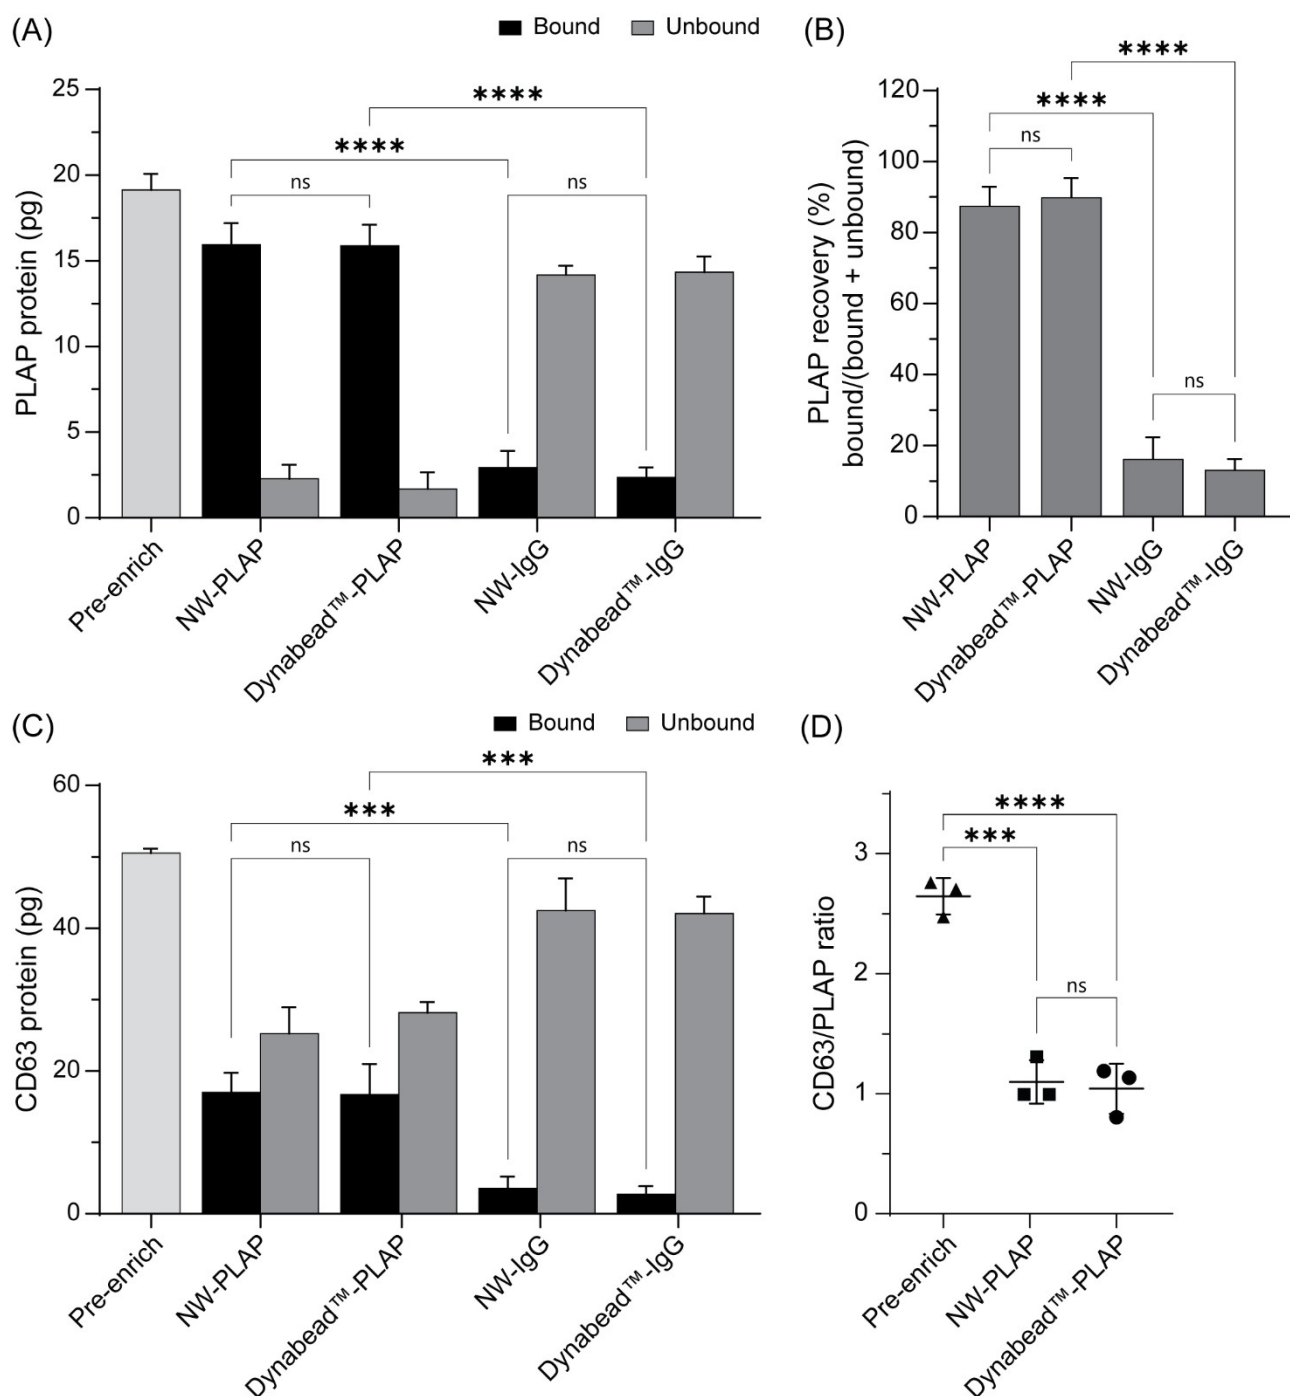

**Fig. S5** (A) Quantification of PLAP in the pre-enriched sample (after ultracentrifugation of BeWo cell culture media), EVs captured by NWs and Dynabeads conjugated with either anti-PLAP or irrelevant IgG (bound) and the corresponding supernatants (unbound). (B) PLAP recovery of EVs enriched by NW-PLAP and Dynabead™-PLAP presented by the ratio of bound to the total of bound and unbound. (A) Quantification of CD63 in the pre-enriched sample, bound and unbound of NW-PLAP and Dynabead™-PLAP. (D) The ratio of CD63 to PLAP (pg/pg) calculated for the pre-enriched sample, NW-PLAP and Dynabead™-PLAP. Data are presented as means + SD ( $n = 3$ , one-way ANOVA with Tukey's post-test, ns = not significant, \*\*\* $p < 0.001$ , and \*\*\*\* $p < 0.0001$ ).

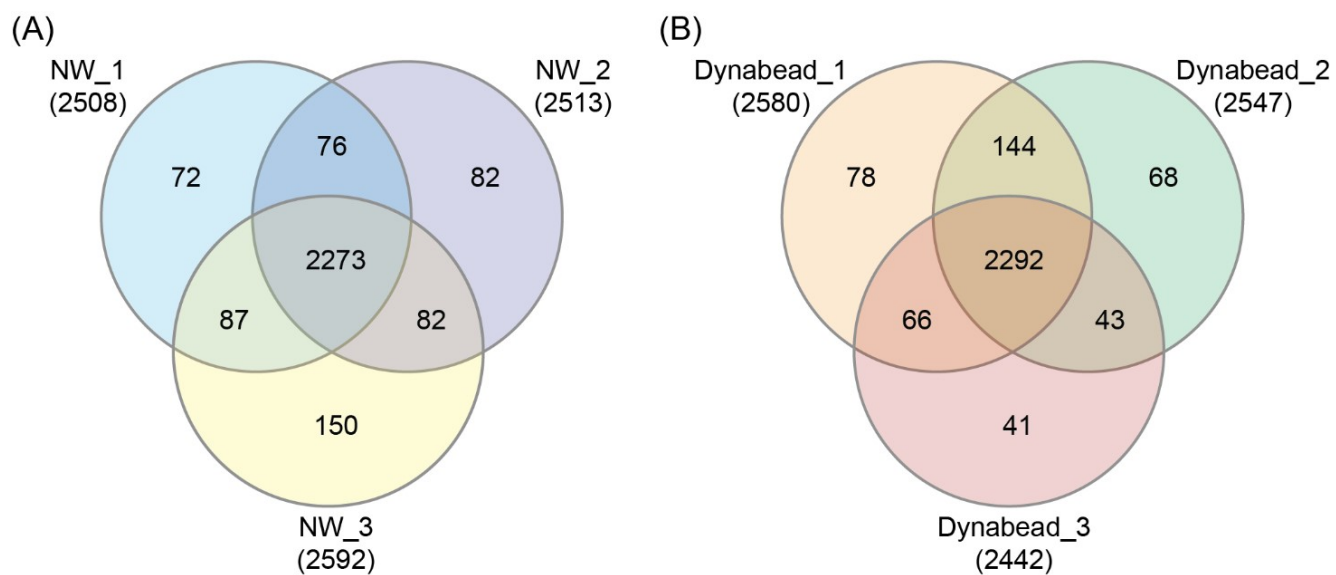

**Fig. S6** Overlap of protein groups enriched by three replicates of (A) NW-PLAP and (B) Dynabead™-PLAP.



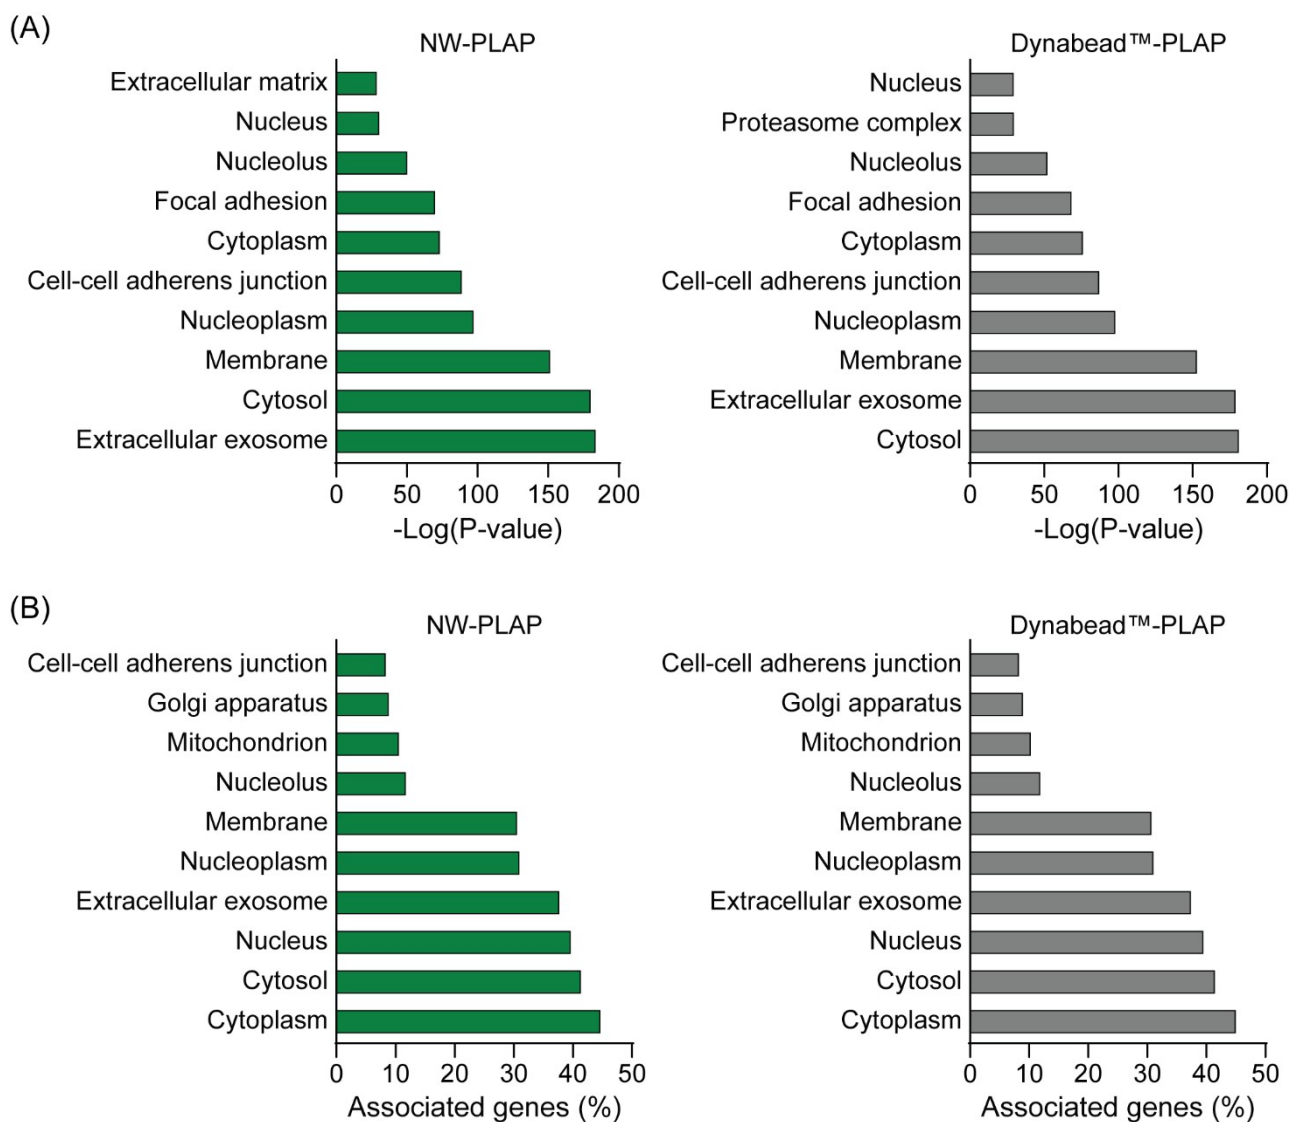

**Fig. S7** Gene ontology (GO) analyses of the protein groups in BeWo EVs enriched by NW-PLAP and Dynabead™-PLAP according to DAVID Bioinformatics Resources. Top 10 GO categories were reported for (A) Cellular component and (B) The percentage of associated genes.



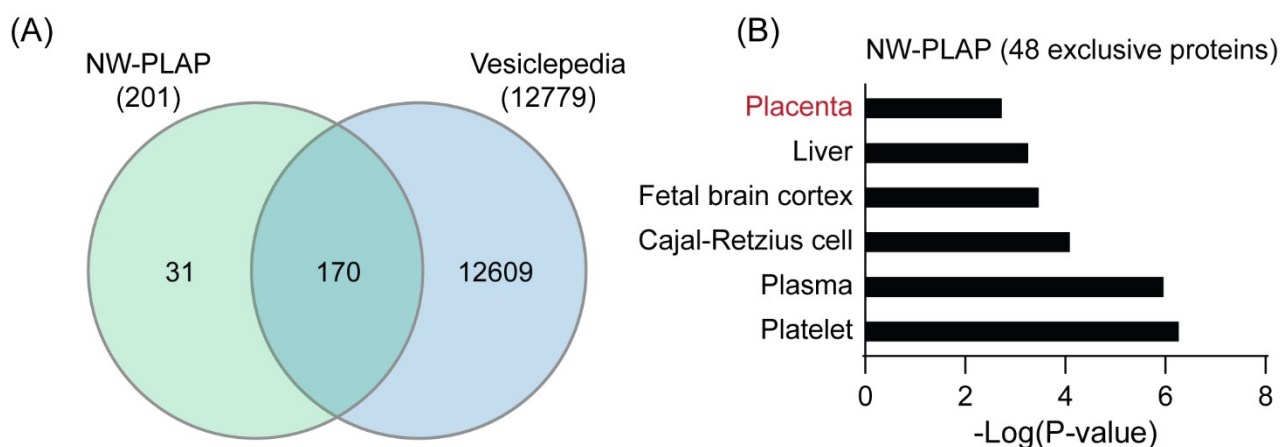

**Fig. S8** (A) Venn diagrams showing overlapping proteins of plasma-derived EVs enriched using NW-PLAP from a 100  $\mu$ L biobanked plasma sample of a preeclamptic pregnancy. (B) Tissue expression of identified proteins analysed by DAVID Bioinformatics Resources. Top 6 categories are reported and ranked by P-value for NW-PLAP.

**Table S1** Batch-to-batch validation of antibody conjugation to NWs

| NW samples                           | XPS elemental composition (%) |      |       |
|--------------------------------------|-------------------------------|------|-------|
|                                      | C                             | N    | O     |
| NW Batch 1<br>Antibody conjugation 1 | 47.79                         | 8.13 | 44.09 |
| NW Batch 1<br>Antibody conjugation 2 | 45.80                         | 7.51 | 46.69 |
| NW Batch 2<br>Antibody conjugation 1 | 49.12                         | 7.85 | 43.03 |
